# Supplementary material
Source: PubMed Central journal article supplement (PMC5828020)
Supplement: NIHMS942305-supplement-1.pdf [file NIHMS942305-supplement-1.pdf]

## Supplementary Online Content

Tjoa T, Manuel CT, Leary RP, Harb R, Protsenka DE, Wong BJF. A finite element model to simulate formation of the inverted-V deformity. *JAMA Facial Plast Surg*. Published online December 23, 2015.  
doi:10.1001/jamafacial.2015.1954.

**eFigure.** Displacement (Depression) of the Nasal Dorsum of the Partially Connected and Fully Separated Models

This supplementary material has been provided by the authors to give readers additional information about their work.

**eFigure.** Displacement (Depression) of the Nasal Dorsum of the Partially Connected and Fully Separated Models

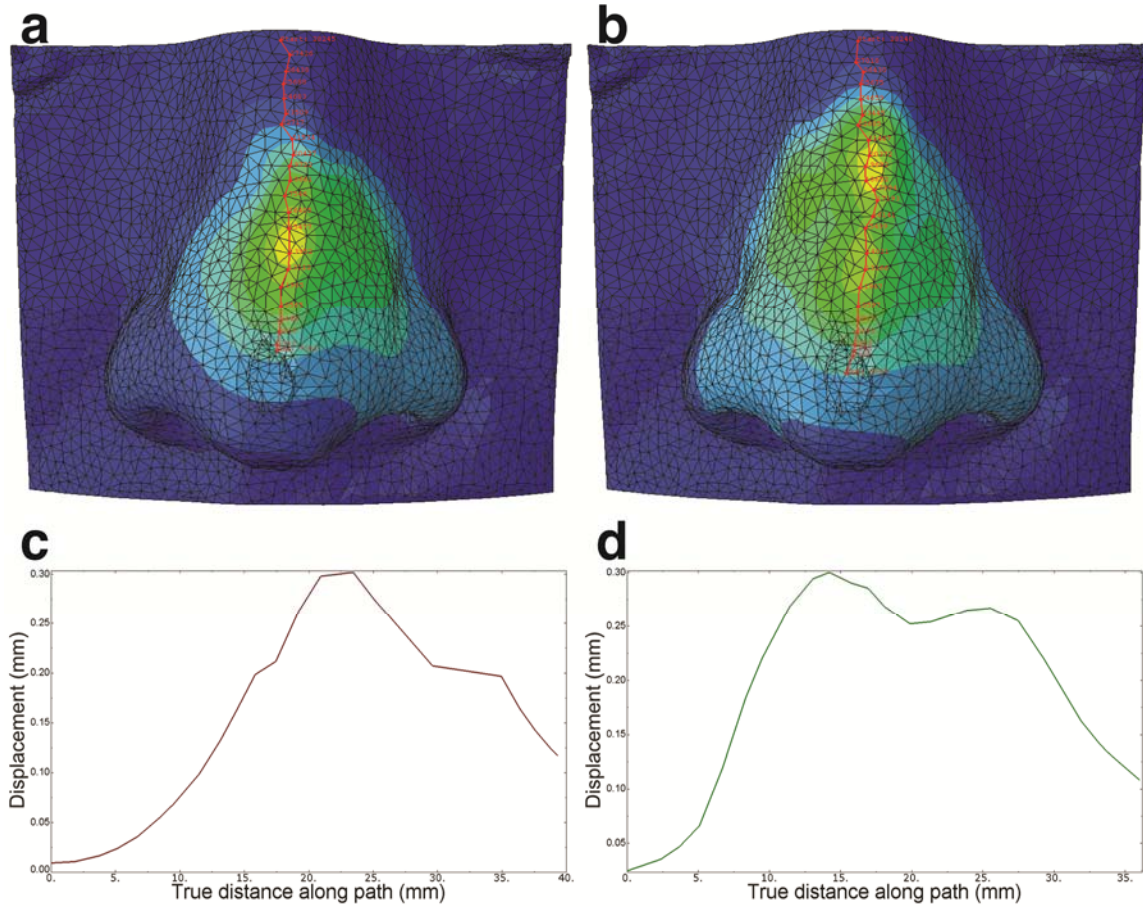

a) The nodal path used to query the displacement of the partially connected model. b) Corresponding displacement as a function of the distance along the path of the partially connected model. c) The nodal path used to query the displacement of the fully separated model. d) Corresponding displacement as a function of the distance along the path of the fully separated model.
